# Supplementary material
Source: HighWire-hosted journal article supplement (https://jitc.bmj.com/content/9/1/e001313)

## Supplementary Figure 2

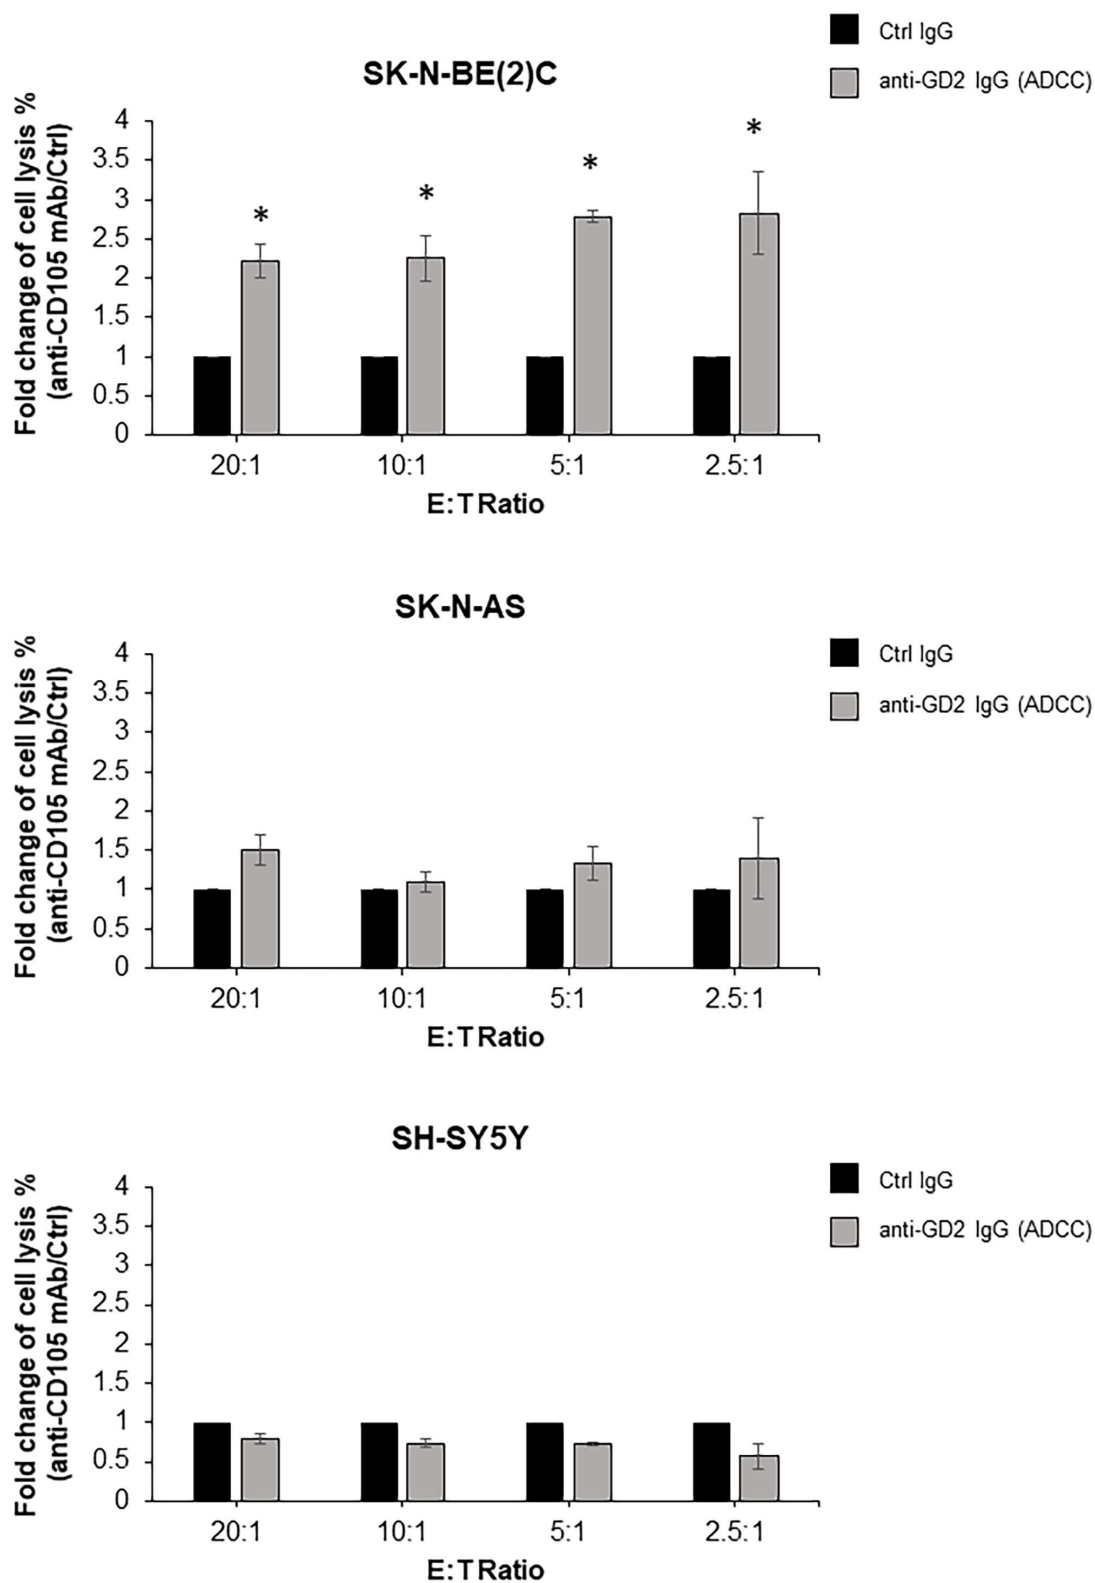

Supplement: inline-supplementary-material-6 [file inline-supplementary-material-6.pdf]

## Supplementary Figure 3

A

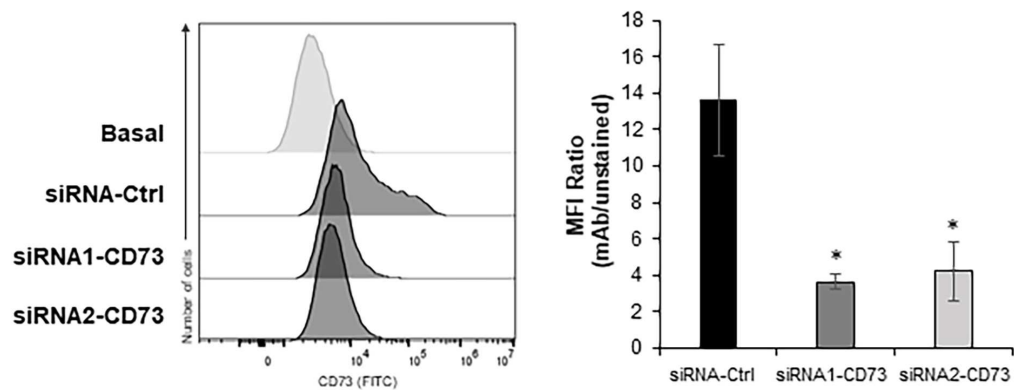

B

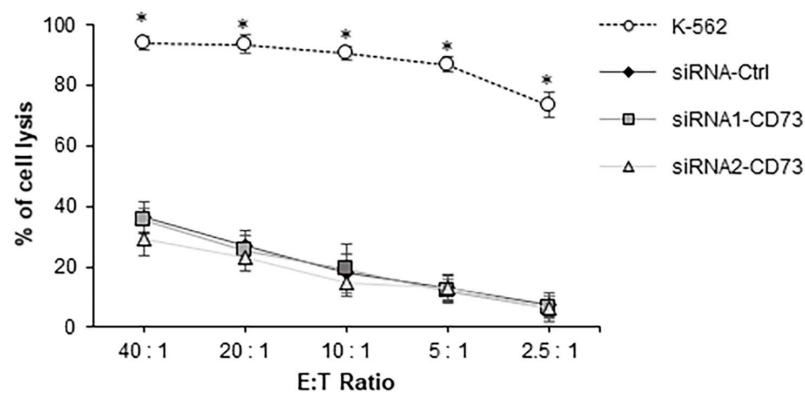

C

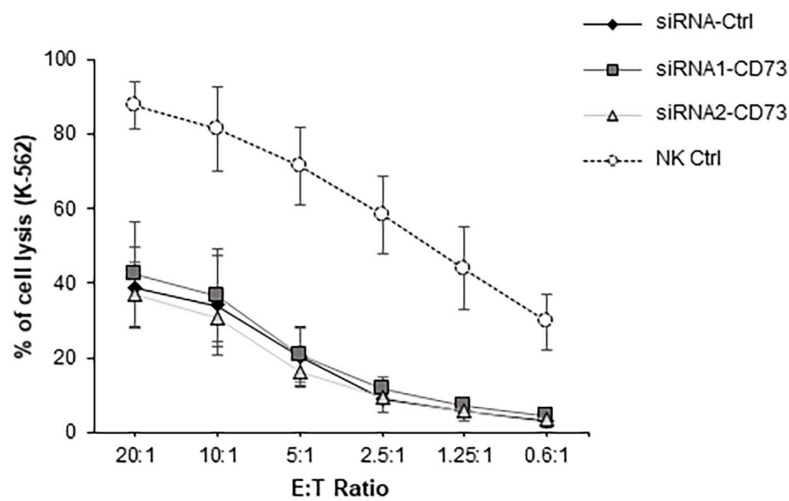

Supplement: inline-supplementary-material-7 [file inline-supplementary-material-7.pdf]
